# Supplementary material for: Chitosan-coated cerium oxide nanocubes accelerate cutaneous wound healing by curtailing persistent inflammation
Source: Royal Society of Chemistry journal article supplement (doi:10.1039/c7qi00707h), 2017-12-11
Supplement: c7qi00707h1.pdf [file c7qi00707h1.pdf]

*Supplementary information for*

## **Chitosan-coated cerium oxide nanocubes accelerate cutaneous wound healing by curtailing persistent inflammation**

Xue Huang,<sup>a,#</sup> Lin-Dong Li,<sup>b,#</sup> Guang-Ming Lyu,<sup>b</sup> Bai-Yu Shen,<sup>a</sup> Yan-Fei Han,<sup>a</sup> Jing-Lin Shi,<sup>c</sup> Jia-Li Teng,<sup>c</sup> Li Feng,<sup>c</sup> Shao-Yan Si,<sup>d</sup> Ji-Hua Wu,<sup>e</sup> Yan-Jun Liu,<sup>\*ac</sup> Ling-Dong Sun<sup>\*b</sup> and Chun-Hua Yan<sup>\*b</sup>

<sup>a</sup> *Department of Endocrinology, 306 Hospital of PLA, Teaching Hospital of Peking University, Beijing 100101, China. Email: yanjunl@yeah.net; Fax: +86-10-64860685; Tel: +86-10-66356374*

<sup>b</sup> *Beijing National Laboratory for Molecular Sciences, State Key Laboratory of Rare Earth Materials Chemistry and Applications, PKU-HKU Joint Laboratory in Rare Earth Materials and Bioinorganic Chemistry, College of Chemistry and Molecular Engineering, Peking University, Beijing 100871, China. Email: sun@pku.edu.cn, yan@pku.edu.cn; Fax: +86-10-62754179; Tel: +86-10-62754179*

<sup>c</sup> *Department of Endocrinology, 306 Hospital of PLA, Beijing 100101, China*

<sup>d</sup> *Department of Special Medical Research, 306 Hospital of PLA, Beijing 100101, China*

<sup>e</sup> *Department of Pathology, 306 Hospital of PLA, Beijing 100101, China*

<sup>#</sup> *These authors contributed equally to this work.*

## Experimental Section

**Cell culture.** Rat insulinoma cell line INS-1 was purchased from the National Platform of Experimental Cell Resources for Sci-Tech (China). The cells were cultured in RPMI-1640 medium supplemented with 10% fetal bovine serum, 100 U/mL penicillin, 100  $\mu\text{g}/\text{mL}$  streptomycin, 1 mM sodium pyruvate and 50  $\mu\text{M}$   $\beta$ -mercaptoethanol under 37 °C, saturated humidity and 5%  $\text{CO}_2$  (v/v). The cells were passaged every four to five days and the medium was changed every two days.

**Cytotoxicity assay.** Cell Counting Kit-8 (CCK-8, Dojindo, Kumamoto, Japan) was used to evaluate cell viability. Tetrazolium salt in the kit was reduced by dehydrogenases in cell mitochondria to a highly soluble yellow formazan, whose characteristic absorption at 450 nm can be employed as an indicator of cell viability. The cells were first plated in a 96-well plate with a density of  $1.5 \times 10^4$  per well in 120  $\mu\text{L}$  medium and pre-incubated for 24 h. 6  $\mu\text{L}$  of CCNs of different concentrations were subsequently added, and the cells were further incubated for 48 h. Finally, the medium was replaced with fresh medium containing CCK-8 and further incubated for 2 h, after which the absorbance of each well at 450 nm and the reference wavelength of 650 nm was collected with a Synergy 4 multi-mode microplate reader (BioTek, USA).

**Table S1. Description of primers used in RT-PCR**

| Gene          | Primer sequence                                                     | Product size | Annealing temp. | Accession number |
|---------------|---------------------------------------------------------------------|--------------|-----------------|------------------|
| GAPDH         | F:5'-CTTCAACAGCAACTCCCATTTC-3'<br>R:5'-GTAGCCATATTCATTGTCATACCAG-3' | 106          | 60 °C           | NC_005103        |
| TNF- $\alpha$ | F:5'-ATCCGAGATGTGGAAGTGGC-3'<br>R:5'-CGATCACCCCGAAGTTCAGT-3'        | 153          | 60 °C           | NM012675.3       |
| IL-10         | F:5'-TAAAAGCAAGGCAGTGGAGC-3'<br>R:5'-GTCACGTAGGCTTCTATGCAG-3'       | 161          | 60 °C           | NM012854.2       |

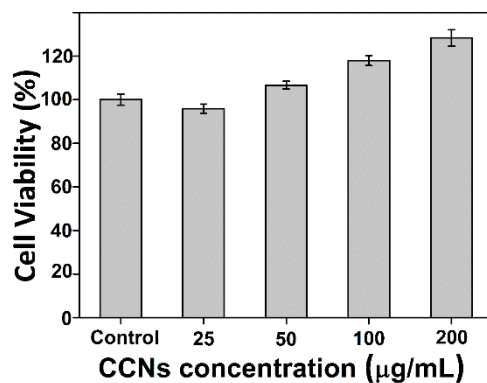

**Figure S1.** Cell viability of INS-1 cells incubated with CCNs of different concentrations for 48

h. Data are expressed as means  $\pm$  SD,  $n = 6$ .

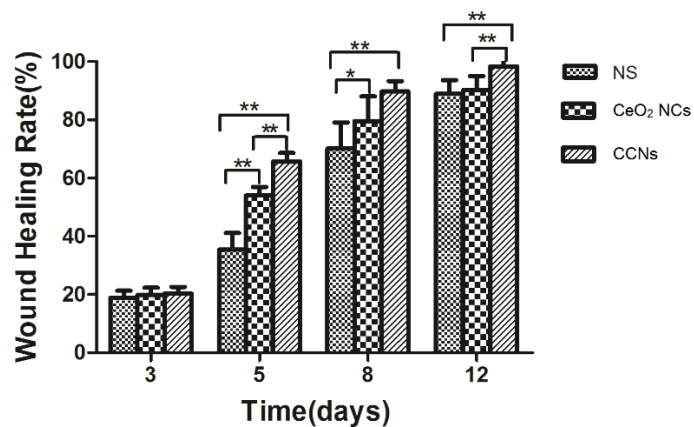

**Figure S2.** Wound healing rate (%) of NS, as-prepared CeO<sub>2</sub> NCs and CCN-treated groups on day 2, 5, 8 and 12 post-wounding. Data are expressed as means  $\pm$  SD. \* $p < 0.05$ , \*\* $p < 0.01$  vs. other group(s) on the same day.

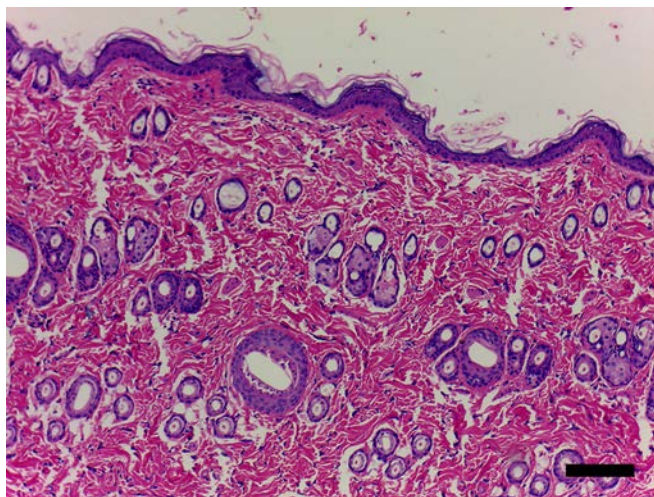

**Figure S3.** Representative image of H&E stained histopathological sections of normal rat skin (scale bar: 400  $\mu$ m).
